# Supplementary material for: Informing, simulating experience, or both: A field experiment on phishing risks
Source: PubMed Central journal article supplement (PMC6919577; doi:10.1371/journal.pone.0224216), 2019-12-18
Supplement: pone.0224216.s002.pdf [file pone.0224216.s002.pdf]

| Attribute                      | Whole sample |       | Excluding div. C |       |
|--------------------------------|--------------|-------|------------------|-------|
|                                | $\chi^2$     | $p$   | $\chi^2$         | $p$   |
| <i>Age</i>                     | 2.479        | 0.479 | 28.645           | 0.000 |
| <i>Age-Group</i>               | 3.697        | 0.296 | 26.179           | 0.000 |
| <i>Gender</i>                  | 0.508        | 0.917 | 5.544            | 0.136 |
| <i>Employee Contract</i>       | 0.932        | 0.818 | 6.822            | 0.078 |
| <i>Organisational division</i> | 21.256       | 0.000 | 15.274           | 0.002 |
