# Supplementary material for: Informing, simulating experience, or both: A field experiment on phishing risks
Source: PubMed Central journal article supplement (PMC6919577; doi:10.1371/journal.pone.0224216), 2019-12-18
Supplement: pone.0224216.s003.pdf [file pone.0224216.s003.pdf]

|                | Whole Sample |             |                    | Excluding div. C |             |                    |
|----------------|--------------|-------------|--------------------|------------------|-------------|--------------------|
|                | <i>Visit</i> | <i>Fill</i> | <i>Fill  Visit</i> | <i>Visit</i>     | <i>Fill</i> | <i>Fill  Visit</i> |
| <i>Control</i> | 32.21%       | 21.78%      | 67.62%             | 32.39%           | 22.13%      | 68.32%             |
| <i>Info</i>    | 25.58%       | 16.28%      | 63.62%             | 24.06%           | 14.53%      | 60.38%             |
| <i>Exp</i>     | 23.31%       | 13.58%      | 58.27%             | 19.34%           | 10.67%      | 55.21%             |
| <i>ExpInfo</i> | 23.92%       | 12.80%      | 53.51%             | 22.43%           | 12.09%      | 53.90%             |
