# Supplementary material for: Informing, simulating experience, or both: A field experiment on phishing risks
Source: PubMed Central journal article supplement (PMC6919577; doi:10.1371/journal.pone.0224216), 2019-12-18
Supplement: pone.0224216.s004.pdf [file pone.0224216.s004.pdf]

## (a) Whole sample

Visit

|             | <i>Info</i>    |       | <i>Exp</i> |       | <i>ExpInfo</i> |       |
|-------------|----------------|-------|------------|-------|----------------|-------|
|             | t              | p     | t          | p     | t              | p     |
|             | <i>Control</i> | 2.220 | 0.032      | 3.723 | 0.000          | 3.830 |
| <i>Info</i> |                |       | 0.747      | 0.459 | 0.579          | 0.566 |
| <i>Exp</i>  |                |       |            |       | -0.273         | 0.786 |

Fill

|             | <i>Info</i>    |       | <i>Exp</i> |       | <i>ExpInfo</i> |       |
|-------------|----------------|-------|------------|-------|----------------|-------|
|             | t              | p     | t          | p     | t              | p     |
|             | <i>Control</i> | 2.361 | 0.023      | 4.328 | 0.000          | 5.116 |
| <i>Info</i> |                |       | 1.163      | 0.251 | 1.577          | 0.123 |
| <i>Exp</i>  |                |       |            |       | 0.450          | 0.654 |

Fill|Visit

|             | <i>Info</i>    |       | <i>Exp</i> |       | <i>ExpInfo</i> |       |
|-------------|----------------|-------|------------|-------|----------------|-------|
|             | t              | p     | t          | p     | t              | p     |
|             | <i>Control</i> | 1.103 | 0.276      | 2.542 | 0.014          | 4.176 |
| <i>Info</i> |                |       | 1.253      | 0.216 | 2.707          | 0.009 |
| <i>Exp</i>  |                |       |            |       | 1.486          | 0.142 |

## (b) Excluding div. C

Visit

|             | <i>Info</i>    |       | <i>Exp</i> |       | <i>ExpInfo</i> |       |
|-------------|----------------|-------|------------|-------|----------------|-------|
|             | t              | p     | t          | p     | t              | p     |
|             | <i>Control</i> | 2.642 | 0.012      | 5.159 | 0.000          | 3.971 |
| <i>Info</i> |                |       | 1.619      | 0.115 | 0.563          | 0.577 |
| <i>Exp</i>  |                |       |            |       | -1.404         | 0.167 |

Fill

|             | <i>Info</i>    |       | <i>Exp</i> |       | <i>ExpInfo</i> |       |
|-------------|----------------|-------|------------|-------|----------------|-------|
|             | t              | p     | t          | p     | t              | p     |
|             | <i>Control</i> | 3.227 | 0.003      | 5.781 | 0.000          | 4.794 |
| <i>Info</i> |                |       | 1.909      | 0.065 | 1.145          | 0.259 |
| <i>Exp</i>  |                |       |            |       | -0.829         | 0.411 |

Fill|Visit

|             | <i>Info</i>    |       | <i>Exp</i> |       | <i>ExpInfo</i> |       |
|-------------|----------------|-------|------------|-------|----------------|-------|
|             | t              | p     | t          | p     | t              | p     |
|             | <i>Control</i> | 1.870 | 0.070      | 2.767 | 0.009          | 3.618 |
| <i>Info</i> |                |       | 0.942      | 0.352 | 1.604          | 0.116 |
| <i>Exp</i>  |                |       |            |       | 0.581          | 0.564 |
