# Supplementary material for: Informing, simulating experience, or both: A field experiment on phishing risks
Source: PubMed Central journal article supplement (PMC6919577; doi:10.1371/journal.pone.0224216), 2019-12-18
Supplement: pone.0224216.s005.pdf [file pone.0224216.s005.pdf]

|                               | <i>dy/dx</i> - All observations |           |            | <i>dy/dx</i> - excluding NVMA |           |            |
|-------------------------------|---------------------------------|-----------|------------|-------------------------------|-----------|------------|
|                               | Visit                           | Fill      | Fill Visit | Visit                         | Fill      | Fill Visit |
| <b>Treatment</b>              |                                 |           |            |                               |           |            |
| <i>Control</i> omitted        |                                 |           |            |                               |           |            |
| <i>Info</i>                   | -0.079*                         | -0.069*   | -0.056     | -0.096*                       | -0.096**  | -0.120**   |
|                               | (0.037)                         | (0.029)   | (0.041)    | (0.043)                       | (0.033)   | (0.043)    |
| <i>Exp</i>                    | -0.088**                        | -0.068**  | -0.082*    | -0.137***                     | -0.113*** | -0.125**   |
|                               | (0.033)                         | (0.026)   | (0.038)    | (0.040)                       | (0.031)   | (0.041)    |
| <i>ExpInfo</i>                | -0.087**                        | -0.085*** | -0.139***  | -0.110**                      | -0.106*** | -0.150***  |
|                               | (0.031)                         | (0.025)   | (0.036)    | (0.039)                       | (0.030)   | (0.038)    |
| <b>Gender</b>                 |                                 |           |            |                               |           |            |
| <i>male</i>                   | 0.040***                        | 0.015*    | -0.040*    | 0.032**                       | 0.010     | -0.049*    |
|                               | (0.009)                         | (0.008)   | (0.020)    | (0.010)                       | (0.009)   | (0.024)    |
| <b>Employee contract</b>      |                                 |           |            |                               |           |            |
| <i>Internal Employee</i>      | 0.005                           | -0.014    | -0.065*    | 0.009                         | -0.006    | -0.046     |
|                               | (0.014)                         | (0.011)   | (0.030)    | (0.013)                       | (0.011)   | (0.030)    |
| <b>Age group</b>              |                                 |           |            |                               |           |            |
| <i>16-25</i> omitted          |                                 |           |            |                               |           |            |
| <i>26-35</i>                  | 0.022                           | 0.022     | 0.091      | 0.031                         | 0.005     | -0.089     |
|                               | (0.024)                         | (0.016)   | (0.085)    | (0.030)                       | (0.024)   | (0.110)    |
| <i>36-45</i>                  | 0.082***                        | 0.062***  | 0.135      | 0.077**                       | 0.030     | -0.089     |
|                               | (0.024)                         | (0.016)   | (0.081)    | (0.030)                       | (0.023)   | (0.107)    |
| <i>46-55</i>                  | 0.133***                        | 0.110***  | 0.215**    | 0.134***                      | 0.080***  | -0.017     |
|                               | (0.024)                         | (0.017)   | (0.081)    | (0.030)                       | (0.024)   | (0.106)    |
| <i>&gt;55</i>                 | 0.137***                        | 0.132***  | 0.285***   | 0.129***                      | 0.098***  | 0.070      |
|                               | (0.025)                         | (0.018)   | (0.081)    | (0.031)                       | (0.025)   | (0.107)    |
| <b>Division fixed effects</b> | Yes                             | Yes       | Yes        | Yes                           | Yes       | Yes        |
| Observations                  | 10929                           | 10929     | 2869       | 7994                          | 7994      | 1947       |

Division fixed effects are added while base division is B.

Standard errors in parentheses

\*  $p < 0.05$ , \*\*  $p < 0.01$ , \*\*\*  $p < 0.001$
