# Supplementary material for: Informing, simulating experience, or both: A field experiment on phishing risks
Source: PubMed Central journal article supplement (PMC6919577; doi:10.1371/journal.pone.0224216), 2019-12-18
Supplement: pone.0224216.s006.pdf [file pone.0224216.s006.pdf]

(a) Whole sample

Visit

---

|             | <i>Exp</i> |       | <i>ExpInfo</i> |       |
|-------------|------------|-------|----------------|-------|
|             | $\chi^2$   | p     | $\chi^2$       | p     |
| <i>Info</i> | 0.51       | 0.475 | 0.47           | 0.493 |
| <i>Exp</i>  |            |       | 0.02           | 0.888 |

---

Fill

---

|             | <i>Exp</i> |       | <i>ExpInfo</i> |       |
|-------------|------------|-------|----------------|-------|
|             | $\chi^2$   | p     | $\chi^2$       | p     |
| <i>Info</i> | 1.08       | 0.299 | 2.49           | 0.115 |
| <i>Exp</i>  |            |       | 0.33           | 0.565 |

---

Fill|Visit

---

|             | <i>Exp</i> |       | <i>ExpInfo</i> |       |
|-------------|------------|-------|----------------|-------|
|             | $\chi^2$   | p     | $\chi^2$       | p     |
| <i>Info</i> | 1.92       | 0.166 | 7.41           | 0.007 |
| <i>Exp</i>  |            |       | 1.43           | 0.232 |

---

(b) Excluding div. C

Visit

---

|             | <i>Exp</i> |       | <i>ExpInfo</i> |       |
|-------------|------------|-------|----------------|-------|
|             | $\chi^2$   | p     | $\chi^2$       | p     |
| <i>Info</i> | 3.68       | 0.055 | 0.54           | 0.461 |
| <i>Exp</i>  |            |       | 2.07           | 0.150 |

---

Fill

---

|             | <i>Exp</i> |       | <i>ExpInfo</i> |       |
|-------------|------------|-------|----------------|-------|
|             | $\chi^2$   | p     | $\chi^2$       | p     |
| <i>Info</i> | 4.87       | 0.027 | 1.26           | 0.262 |
| <i>Exp</i>  |            |       | 0.86           | 0.354 |

---

Fill|Visit

---

|             | <i>Exp</i> |       | <i>ExpInfo</i> |       |
|-------------|------------|-------|----------------|-------|
|             | $\chi^2$   | p     | $\chi^2$       | p     |
| <i>Info</i> | 0.52       | 0.472 | 1.58           | 0.209 |
| <i>Exp</i>  |            |       | 0.16           | 0.693 |

---
