# Supplementary material for: Informing, simulating experience, or both: A field experiment on phishing risks
Source: PubMed Central journal article supplement (PMC6919577; doi:10.1371/journal.pone.0224216), 2019-12-18

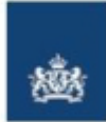

**EZ - MPRS**  
Ministerie van Economische Zaken

### EZ - Mobile Password Recovery System (MPRS) 1/2

Link in two simple steps your useraccount to your mobile phone number

|                 |                                     |
|-----------------|-------------------------------------|
| Username *      | <input type="text"/>                |
| Password *      | <input type="password"/>            |
| Mobile number * | <input type="text"/>                |
|                 | <input type="button" value="Send"/> |

\* Indicates required field

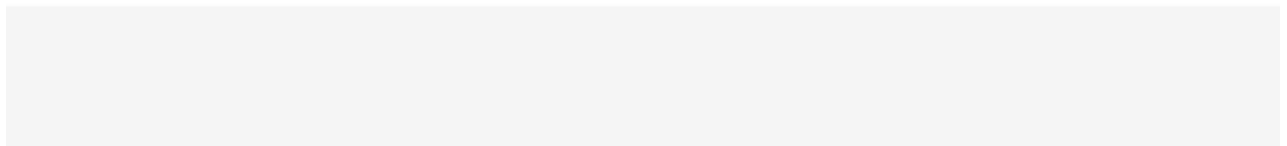

Supplement: pone.0224216.s008.pdf [file pone.0224216.s008.pdf]
