# Supplementary material for: Informing, simulating experience, or both: A field experiment on phishing risks
Source: PubMed Central journal article supplement (PMC6919577; doi:10.1371/journal.pone.0224216), 2019-12-18
Supplement: pone.0224216.s009.pdf [file pone.0224216.s009.pdf]

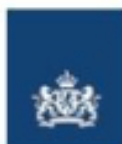

**EZ - MPRS**  
Ministerie van Economische Zaken

### **EZ - Mobile Password Recovery System (MPRS) 2/2**

Thanks for your registration. Your request is being processed. You will receive confirmation of your registration by email within 5 working days.

Business Operations / DICTU ServiceDesk
