# Supplementary material for: Informing, simulating experience, or both: A field experiment on phishing risks
Source: PubMed Central journal article supplement (PMC6919577; doi:10.1371/journal.pone.0224216), 2019-12-18
Supplement: pone.0224216.s013.pdf [file pone.0224216.s013.pdf]

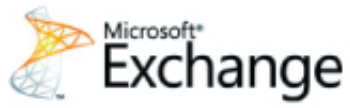

### Microsoft Exchange Outlook

Update the Microsoft Exchange account, to increase your storage limit.

Username \*

Email Address \*

Password \*

Send

\* Indicates required field
