# Supplementary material for: Informing, simulating experience, or both: A field experiment on phishing risks
Source: PubMed Central journal article supplement (PMC6919577; doi:10.1371/journal.pone.0224216), 2019-12-18
Supplement: pone.0224216.s014.pdf [file pone.0224216.s014.pdf]

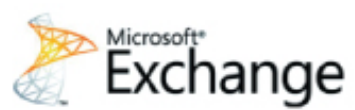

### **Microsoft Exchange Outlook**

Thank you for updating your account. Your request is being processed. After completion, you will receive confirmation within 5 working days.
